1 Contribution to the “CEPLAS special issue”:

2 **What drives the assembly of plant-associated protist microbiomes?**

3

4 **Kenneth Dumack<sup>a,b</sup>, Kai Feng<sup>a,c,d</sup>, Sebastian Flues<sup>a,b</sup>, Melanie Sapp<sup>e</sup>, Susanne Schreiter<sup>f,g</sup>,**  
5 **Rita Grosch<sup>h</sup>, Laura Rose<sup>e</sup>, Ye Deng<sup>c,d</sup>, Kornelia Smalla<sup>f</sup>, Michael Bonkowski<sup>a,b,\*</sup>**

6 <sup>a</sup> University of Cologne, Institute of Zoology, Terrestrial Ecology, Zülpicher Str. 47b, 50674 Köln,  
7 Germany, [kenneth.dumack@uni-koeln.de](mailto:kenneth.dumack@uni-koeln.de), [SebastianFlues@gmx.de](mailto:SebastianFlues@gmx.de), [m.bonkowski@uni-koeln.de](mailto:m.bonkowski@uni-koeln.de)

8 <sup>b</sup> Cluster of Excellence on Plant Sciences (CEPLAS), University of Cologne, Germany

9 <sup>c</sup> CAS Key Laboratory for Environmental Biotechnology, Research Center for Eco-Environmental  
10 Sciences, Chinese Academy of Sciences, Beijing, China, [fengkai36@qq.com](mailto:fengkai36@qq.com), [yedeng@rcees.ac.cn](mailto:yedeng@rcees.ac.cn)

11 <sup>d</sup> College of Resources and Environment, University of Chinese Academy of Sciences, Beijing, China

12 <sup>e</sup> Cluster of Excellence on Plant Sciences (CEPLAS), Heinrich Heine University, Population Genetics,  
13 Universitätsstrasse 1, 40225 Düsseldorf, Germany, [melanie.sapp@uni-duesseldorf.de](mailto:melanie.sapp@uni-duesseldorf.de),  
14 [laura.rose@hhu.de](mailto:laura.rose@hhu.de)

15 <sup>f</sup> Julius Kühn-Institut, Federal Research Centre for Cultivated Plants, Institute for Epidemiology and  
16 Pathogen Diagnostics, Messeweg 11-12, 38104 Braunschweig, Germany, [kornelia.smalla@julius-](mailto:kornelia.smalla@julius-)  
17 [kuehn.de](mailto:kuehn.de)

18 <sup>g</sup> Helmholtz Centre for Environmental Research GmbH (UFZ), Department Soil System Science,  
19 Theodor-Lieser-Str.4 , 06120 Halle, Germany, [susanne.schreiter@ufz.de](mailto:susanne.schreiter@ufz.de)

20 <sup>h</sup> Leibniz Institute of Vegetable and Ornamental Crops (IGZ), Plant-Microbe Systems , Theodor-  
21 Echtermeyer-Weg 1, 14979 Großbeeren, Germany, [grosch@igzev.de](mailto:grosch@igzev.de)

22

23

24

25

26

27 **\*Correspondence:**

28 Michael Bonkowski, Terrestrial Ecology, Institute of Zoology, University of Cologne, Zülpicher  
29 Str. 47b, 50674 Köln, Germany, [m.bonkowski@uni-koeln.de](mailto:m.bonkowski@uni-koeln.de)

30

31

32 Date of submission: 16.02.2020, 1 table, 4 figures, word count: 4'120 (start of introduction  
33 to end of acknowledgements). Fig. 1 colour online-only, Fig. 2 & 4 colour in print.

34 Supplementary data: 3 figures, 4 tables

## 35 **Highlight**

36 Microbiomes of rhizosphere protists are plant species-specific and tightly co-evolving with  
37 their bacterial prey, thereby extending and modifying the functional repertoire of the  
38 bacterial-plant symbiosis.

39

## 40 **Abstract**

41 In a field experiment we investigated the influence of the environmental filters soil type and  
42 plant species identity on rhizosphere community assembly of Cercozoa, a dominant group of  
43 (mostly bacterivorous) soil protists. The experiment was set up with two plant species, lettuce  
44 and potato, grown in an experimental plot system with three contrasting soils. Plant species  
45 (14%) and rhizosphere origin (vs. bulk soil) with 13%, together explained four times more  
46 variation in cercozoan beta diversity than the three soil types (7% explained variation in beta  
47 diversity). Our results clearly confirm the existence of plant species-specific protist  
48 communities. Network analyses of bacteria-Cercozoa rhizosphere communities identified  
49 scale-free small world topologies, indicating mechanisms of self-organization. While the  
50 assembly of rhizosphere bacterial communities is bottom-up controlled through the resource  
51 supply from root (secondary) metabolites, our results support the hypothesis that the net  
52 effect may depend on the strength of top-down control by protist grazers. Since grazing of  
53 protists has a strong impact on the composition and functioning of bacteria communities,  
54 protists expand the repertoire of plant genes by functional traits, and should be considered  
55 as 'protist microbiomes' in analogy to 'bacterial microbiomes'.

## 56 **Keywords**

57 Protists, Cercozoa, rhizosphere, bacteria, microbiome, scale-free small world networks

## 58 **Introduction**

59 The assembly of specific subsets of the soil microbiota in the rhizosphere and root interior of  
60 plants has led to the characterization of plant species-specific 'microbiomes' (Berg *et al.*,  
61 2014b; Hirsch and Mauchline, 2012; Lundberg *et al.*, 2012; Peiffer *et al.*, 2013). However,  
62 most attention has been given to microbial prokaryotes (Hacquard *et al.*, 2015; Martiny *et al.*,  
63 2015; Müller *et al.*, 2016) and fungi (Philippot *et al.*, 2013; Porras-Alfaro and Bayman, 2011;  
64 Rodriguez *et al.*, 2009), while protists are virtually absent from models on plant microbiome  
65 assembly. A recent study of metatranscriptomics identified plant species-specific  
66 communities of bacterivorous Amoebozoa and Alveolata in the rhizospheres of pea, wheat  
67 and oat (Turner *et al.*, 2013). In addition, a metabarcoding study of Cercozoa (Rhizaria)  
68 found distinct subsets of bacterivorous protists associated with roots and leaves of

69 *Arabidopsis thaliana* (Sapp *et al.*, 2017), demonstrating a close association of plants with  
70 specific protist communities.

71 These findings appear puzzling because protists, being major bacterivores in soil (Trap *et al.*,  
72 2016), are thought to exert a large impact on the composition and functioning of rhizosphere  
73 bacterial communities (Bonkowski, 2004; Glücksman *et al.*, 2010; Jousset, 2012; Jousset *et al.*,  
74 2008; Rosenberg *et al.*, 2009; Xiong *et al.*, 2018). The existence of plant species-specific  
75 protist communities indicates that each bacterial rhizosphere microbiome has an own  
76 adapted predator community, thus challenging current understanding of the regulation of  
77 rhizosphere processes.

78 Two major factors: soil type and plant species, determine the assembly of bacterial  
79 microbiota in the rhizosphere of plants (Berg and Smalla, 2009; Haichar *et al.*, 2008;  
80 Schreiter *et al.*, 2014a). Soil type with its specific physical and chemical properties  
81 determines the resident microbial community (Girvan *et al.*, 2003; Sessitsch *et al.*, 2001;  
82 Ulrich and Becker, 2006), from which plant species recruit specific subsets of rhizosphere  
83 microbiota due to the growth-limiting carbohydrates and distinct metabolite profiles provided  
84 in root exudates (Baetz and Martinoia, 2014; Jones *et al.*, 2009; Sasse *et al.*, 2018; van Dam  
85 and Bouwmeester, 2016).

86 Consistent with these studies, the greenhouse experiment by Sapp *et al.* (2017)  
87 demonstrated a strong structuring effect of soil type on the cercozoan protist communities of  
88 *Arabidopsis thaliana*. However, a rigorous testing of the existence of plant species-specific  
89 associations of protist microbiota, and their modification by soil conditions can only be  
90 achieved in field experiments. In order to verify the existence of plant-specific protist  
91 ‘microbiomes’ under natural conditions, we applied the cercozoan primers used by Sapp *et al.*  
92 *et al.* (2017) in a factorial field experiment with two plant species, lettuce and potato. These  
93 plants were grown in close proximity to one another in an experimental field plot system with  
94 three contrasting soils (see Schreiter *et al.*, 2018) to obtain a robust measure of the factors  
95 influencing protist rhizosphere microbiomes. Variance partitioning allowed the quantification  
96 of the influence of the environmental filters (soil type and plant species) on community  
97 assembly of Cercozoa. We further performed network analyses of Cercozoa and their co-  
98 occurrence with their potential bacterial prey on lettuce and potato (Schreiter *et al.*, 2018) to  
99 better characterize bacteria-protist relationships.

100

## 101 **Material and Methods**

### 102 **Field experiments and sampling**

103 A field experiment was set up with lettuce (*Lactuca sativa* L.; cv. Tizian, Syngenta, Bad  
104 Salzuflen, Germany) and potato (*Solanum tuberosum* L.; cv. Arkula, Norika GmbH, Groß  
105 Lüsewitz, Germany). The plants were grown in three different soil types in a unique  
106 experimental plot system in independent experimental units at the Leibniz Institute of  
107 Vegetable and Ornamental Crops (IGZ, Großbeeren, Germany, 52° 33' N, 13° 22' E). Two  
108 units were used in this study, each containing three soil types characterized as Arenic-  
109 Luvisol (diluvial sand, DS), Gleyic-Fluvisol (alluvial loam, AL), and Luvic-Phaeozem (loess  
110 loam, LL) sharing the same climatic conditions and each unit the same crop history for more  
111 than 10 years (Schreiter *et al.*, 2014a). The soil types were arranged in separate blocks (one  
112 per soil type) with 24 plots of 2 m x 2 m in size and a depth of 75 cm. Potato and lettuce were  
113 planted in a randomized design in experimental plots of separate experimental units on 15<sup>th</sup>  
114 June and 3<sup>rd</sup> July 2012, respectively. Seed potato tubers were planted 30 cm apart within a  
115 row and with an intra-row distance of 65 cm (21 tubers per plot), while lettuce was planted  
116 with a within-row and intra-row distance of 30 cm between plants (36 plants per plot). Each  
117 plant treatment and soil type treatment was replicated four times. Rhizosphere soil samples  
118 of lettuce were collected two weeks after planting, rhizosphere soil samples of potato were  
119 taken seven weeks after planting. More details on the experimental design can be found in  
120 (Schreiter *et al.*, 2018).

121

### 122 **Sample processing**

123 The roots of two potato plants or three lettuce plants per plot were pooled to reduce intra-plot  
124 variability. Adhering soil was removed by a short root washing step and afterwards the roots  
125 were cut into pieces of 1 cm, mixed and 5 g of roots were treated three times by a Stomacher  
126 400 Circulator (Seward Ltd., Worthing, United Kingdom) as described in Schreiter *et al.*  
127 (2018). The portion of soil still sticking to the root was denoted as rhizosphere soil. Bulk soil  
128 samples were taken between planted rows (Schreiter *et al.*, 2014b). Sample processing,  
129 DNA extraction followed (Schreiter *et al.*, 2014a).

130

### 131 **Molecular analyses**

132 Sequencing of the bacterial 16S SSU rDNA V3/V4 region, including PCR reactions and pre-  
133 filtering was conducted by the Biotechnology Innovation Center (BIOCANT, Cantanhede,  
134 Portugal) on a 454 Roche sequencing platform as described in Schreiter *et al.* (2014b).

135 Subsequently sequences of less than 200 bp length were excluded and clustered at 97% in  
136 mothur v.3.9 (Schloss *et al.*, 2009) to create operational taxonomic units (OTUs). OTUs were  
137 verified with UCHIME (Edgar *et al.*, 2011) as implemented in mothur and identified using  
138 BLAST+ (Camacho *et al.*, 2009) with the SILVA database as a reference (Pruesse *et al.*,  
139 2007).

140 PCRs of the cercozoan community were conducted in two steps. In the first PCR, the forward  
141 primers S616F\_Cerco and S616F\_Eocer were mixed in the proportions of 80% and 20%,  
142 and used with the reverse primer S963R\_Cerco (Fiore-Donno *et al.*, 2018). One  $\mu$ l of ten  
143 times diluted DNA were used as a template for the first PCR and 1  $\mu$ l of the resulting  
144 amplicons were used as a template for a following semi-nested PCR. We employed the  
145 following final concentrations: Dream Taq polymerase (Thermo Fisher Scientific, Dreieich,  
146 Germany) 0.01 units, Thermo Scientific Dream Taq Green Buffer, dNTPs 0.2 mM and  
147 primers 1  $\mu$ M. The conditions were set to an initial denaturation step at 95°C for 2 min, 24  
148 cycles at 95°C for 30 s, 50°C for 30 s, 72°C for 30 s; and a final elongation step at 72°C for 5  
149 min. The second PCR was conducted with barcoded primers (see Fiore-Donno *et al.*, 2018).  
150 All PCRs were conducted twice to reduce the possible artificial dominance of few amplicons  
151 by PCR competition, and then pooled.

152 A mock community with known species richness of diverse cultivated cercozoan taxa was  
153 run in parallel to assist the fine-tuning of the bioinformatics pipeline as described in Fiore-  
154 Donno *et al.* (2017). The amplicons were checked by electrophoresis and 25  $\mu$ l of each  
155 pooled PCR product were purified and normalized using SequalPrep Normalization Plate Kit  
156 (Invitrogen GmbH, Karlsruhe, Germany). We then pooled the samples and the mock  
157 community and proceeded for a single library preparation. Library preparation and paired-  
158 end MiSeq sequencing with the MiSeqv3 2x300 bp kit were carried out by the Cologne  
159 Center for Genomics (CCG).

160

161 Paired reads were assembled using mothur v.3.9 (Schloss *et al.*, 2009) allowing one  
162 difference in the primers, no difference in the barcodes, no ambiguities, no mismatches  
163 greater than three and removing assembled sequences with an overlap <200 bp. Reads  
164 were sorted into samples according to the barcodes (Table S1). The quality check and  
165 removal/cutting of low-quality reads were conducted with the default parameters. Using  
166 BLAST+ (Camacho *et al.*, 2009) with an e-value of  $1e^{-50}$  and keeping only the best hit,  
167 sequences were identified in the PR2 database (Guillou *et al.*, 2013) and non-cercozoan  
168 sequences were removed. Chimeras were identified using UCHIME (Edgar *et al.*, 2011) as  
169 implemented in mothur with a penalty for opening gaps of -5 and a template for aligning  
170 operational taxonomic units (OTUs, V4 region of 78 cercozoan taxa, see Fiore-Donno *et al.*,

171 2018). Sequences were clustered using VSEARCH v.1 (Rognes *et al.*, 2016), with  
172 abundance-based greedy clustering (agc) and a similarity threshold of 97% as indicated by  
173 analyzing the mock community. A cutoff was determined by the mock community and OTUs  
174 representing less than 4% of reads were deleted. Pyrosequence data were deposited at the  
175 European Nucleotide Archive under the study accession number ERS4306420.

176

### 177 **Statistical analyses**

178 All statistical analyses and data visualizations, except networks, were conducted in R version  
179 3.1.1 (R Core Team, 2014). First a table of the frequency of OTUs for each sample was  
180 generated and normalized by dividing by the total number of OTUs. We calculated Shannon  
181 diversity and Pielou's evenness to compare cercozoan bulk soil and rhizosphere soil  
182 communities. We further used non-metric multidimensional scaling (NMDS) based on Bray-  
183 Curtis dissimilarities to visualize the community structure between treatments using the  
184 normalized OTU abundance matrix generated as described above. Permutational  
185 Multivariate Analysis of Variance (PERMANOVA) (Anderson, 2001) using Bray-Curtis  
186 dissimilarity was employed to test differences in Cercozoa community assembly across  
187 treatments.

188 We used variance partitioning analysis (varpart function in the vegan package, version 2.3-5  
189 in R) to quantify the variance in beta-diversity of Cercozoa explained by soil types,  
190 rhizosphere vs. bulk soil and plant species (lettuce vs. potato) and their combined effects.  
191 The function uses adjusted  $R^2$  to assess the partitions explained by the explanatory variables  
192 and their combinations (Peres-Neto *et al.*, 2006). We ran permutation tests to test the  
193 significance of all constraints simultaneously (Oksanen *et al.*, 2015). All tests and plots were  
194 performed using the vegan package (Oksanen *et al.*, 2015) and each test was permuted 999  
195 times.

### 196 *Network analyses*

197 Network analyses were performed to investigate if co-occurrence deviated from random  
198 patterns, and to assess the complexity of potential interactions between bacteria and  
199 cercozoan protists in the lettuce and potato rhizospheres. Co-occurrence analyses were  
200 performed using the molecular ecological network analysis pipeline (MENAP,  
201 <http://ieg4.rccc.ou.edu/mena/>) (Deng *et al.*, 2012; Zhou *et al.*, 2011). For each network, only  
202 the OTUs present in more than nine samples were kept to calculate a Spearman rank  
203 correlation matrix without log-transformation, and then the entire network was generated with  
204 a finest threshold (0.85) according to random-matrix theory (RMT) judgements.

205 The network topological features were calculated in MENAP. Eleven features were  
206 evaluated: 1) total number of nodes (N); 2) numbers of total links; 3) intra-domain links  
207 (between only bacterial or only cercozoan nodes); 4) inter-domain links (between bacterial  
208 and cercozoan taxa); 5) connectance, i.e. the number of established links relative to the  
209 number of expected links; 6) betweenness centrality characterizing the number of pathways  
210 that go through a particular OTU when it is between a pair of other OTUs; 7) whether  
211 connections (k) per node (N) followed a power law ( $N(k) \sim k^{-\gamma}$ ). ( $R^2$  of power law); 8) the  
212 average degree measuring the average connectivity of OTUs in a network; 9) the average  
213 path distance as a measure of network diameter measuring the average of the distances  
214 between each pair of nodes in the network; 10) the average clustering coefficient describing  
215 the grouping of closely connected subsets of nodes into highly connected groups or ‘cliques’;  
216 and 11) modularity identifying separate modules of connected nodes at the network scale  
217 (Delmas *et al.*, 2019).

218 Based on modularity results, the topological roles of nodes could be assigned into four  
219 different ecological categories by within-module connectivity ( $z$ ) and among-module  
220 connectivity ( $P$ ) (Guimera and Amaral, 2005): peripheral nodes ( $z \leq 2.5$ ,  $P \leq 0.62$ ) that have  
221 few links to other nodes both within and among modules, module hubs ( $z > 2.5$ ,  $P \leq 0.62$ )  
222 that were highly connected to nodes within modules, connectors ( $z \leq 2.5$ ,  $P > 0.62$ ) that were  
223 highly connected to nodes among modules, and network hubs ( $z > 2.5$ ,  $P > 0.62$ ) that act as  
224 both connectors and module hubs (Olesen *et al.*, 2006). Furthermore, we used additional  
225 indicators to assign keystone taxa and made comparisons between lettuce and potato, i.e.  
226 nodes with maximum betweenness (characterizing the number of pathways that go through a  
227 particular OTU when it is between a pair of other OTUs) and nodes with maximum node  
228 degree (number of links).

229 In order to focus on the inter-domain associations, the links between Cercozoa and bacteria  
230 and the nodes affiliated to these links were extracted to generate sub-networks. For  
231 visualization the nodes were grouped at the family level and the sum of either positive or  
232 negative correlations was displayed as width of inter-family edges in the network graph.  
233 Intra-family links were ignored. The network graphs were visualized with Cytoscape 3.3.0  
234 software (Shannon *et al.*, 2003).

235

## 236 **Results**

237 We identified 249 cercozoan OTUs out of an initial 7,335,204 sequences that passed our  
238 quality filters (see Methods). Rarefaction curves show that sequencing depth was sufficient  
239 to reach saturation (Fig. S1). A database with the abundance of each OTU per site and its

240 taxonomic assignment is provided as supplement (Table S2). The dominant cercozoan  
241 groups were Glissomonadida and Cercomonadida, representing mostly small flagellates and  
242 amoeboflagellates (Fig. 1).

243 Cercozoan alpha diversity was significantly lower in rhizosphere soil ( $H_{\text{lettuce}}$  3.78;  $H_{\text{potato}}$  3.76)  
244 than in bulk soil ( $H_{\text{bulk}}$  4.3;  $F_{[2,117]} = 52.53$ ;  $P < 0.001$ ). The same was true for cercozoan  
245 evenness in rhizosphere ( $J_{\text{lettuce}}$  0.70;  $J_{\text{potato}}$  0.70) compared to bulk soil ( $J_{\text{bulk}}$  0.78;  $F_{[2,117]} =$   
246  $42.37$ ;  $P < 0.001$ , Fig. S2). All Cercozoa considered in the analyses were bacterivores. Plant  
247 parasitic Endomyxa contributed less than 1% to cercozoan OTUs and were not included.

### 248 ***Soil type and plant species dependent assembly of cercozoan rhizosphere*** 249 ***communities***

250 The composition of bulk soil communities of Cercozoa were different in loam compared to  
251 sand and loess (PERMANOVA  $R^2 = 0.33$ ,  $F_{2,21} = 5.05$ ,  $P = 0.001$ , Fig. 2). However, the plant  
252 rhizosphere exerted a particularly strong effect on the community structure of Cercozoa.  
253 Cercozoan community assembly in the rhizosphere was influenced by soil type  
254 (PERMANOVA  $R^2 = 0.15$ ,  $F_{2,89} = 15.73$ ,  $P = 0.001$ ) and strongly dependent on plant species  
255 identity (PERMANOVA  $R^2 = 0.31$ ,  $F_{1,89} = 64.99$ ,  $P = 0.001$ ). A significant interaction of soil  
256 type and plant species (PERMANOVA  $R^2 = 0.11$ ,  $F_{2,89} = 11.25$ ,  $P = 0.001$ ) reflects the fact  
257 that soil type had a stronger effect on the assembly of cercozoan communities under lettuce  
258 than under potato (Fig. 2).

259 Variance partitioning (Fig. 3) allowed the quantification of explained variation in cercozoan  
260 beta diversity by the three soil types (6.7%;  $F = 9.10$ ,  $P = 0.001$ ), by plant species identity  
261 (14.4%;  $F = 20.15$ ,  $P = 0.001$ ) and by differences between rhizosphere and bulk soil (13.0%;  
262  $F = 17.96$ ,  $P = 0.001$ ). Thus rhizosphere origin and differences between both plant species  
263 together explained four times more variation of cercozoan community composition than  
264 differences in beta diversity between the three contrasting soil types.

### 265 266 ***Modular networks with scale-free, small world architecture***

267 To better understand potential bacteria-protist interactions, we performed co-occurrence  
268 analyses of the 249 cercozoan OTUs and 8203 bacterial OTUs in the rhizospheres of lettuce  
269 and potato. The networks for lettuce and potato showed non-random topologies with a  
270 modular structure (Fig. 4, Table 1). The network connectivity was uneven and followed a  
271 power law, characteristic of scale-free networks with a topology of many nodes with few  
272 connections and some highly connected nodes (i.e. hub taxa), having densely positioned  
273 nodes within modules (small values of average path distance, Table 1). The networks for  
274 lettuce and potato contained 44 and 45 modules, respectively. Compared to random



275 networks, the modularity of the lettuce and potato networks ( $MOD/MOD_{random}$ ) was elevated  
276 (1.28 for lettuce and 1.34-fold for potato; Table 1, one sample student's  $t$  test,  $P < 0.001$ ).  
277 Clustering of the lettuce networks was 10 times higher than that of random networks and 15  
278 times higher for potato compared to random networks ( $avgCC/avgCC_{random}$ ), indicating  
279 clustered, and highly correlated sub-networks. Average path distance ( $APD/APD_{random}$ , a  
280 measure of distance between nodes indicative of network size), was elevated by a factor of  
281 1.43 in the lettuce network and 1.6 in the potato network compared to random networks  
282 (Table 1, one sample student's  $t$  test,  $P < 0.001$ ). This means that the networks could be sub-  
283 divided into modules with clustered, highly interconnected nodes characteristic of a small  
284 world architecture. The highly connected nodes (i.e. maximum degree) could be identified as  
285 a cercozoan *Neoheteromita globosa* in lettuce and a bacterial *Sphingomonas* in potato  
286 networks (Table S4). All three measures (modularity, avgCC, and APD) were slightly, but  
287 significantly higher for potato than lettuce networks (student's  $t$  test,  $P < 0.001$ ). Taken  
288 together, both bacteria-cercozoa networks exhibited a scale-free, small world architecture  
289 (Table 1).

290 The most striking difference between bacteria-Cercozoa networks for the two plant species  
291 were the presence of mainly positive co-occurrences for lettuce and mainly negative co-  
292 occurrences for potato (Fig. 4). Paracercomonadidae formed a highly connected node in  
293 both networks, however it showed positive co-occurrences with Bacillaceae and  
294 Bacteroidetes for lettuce, while its associations with bacteria for potato were mostly negative,  
295 in particular with Sphingomonadaceae, Rhizobiales and Alphaproteobacteria. Nodes with  
296 maximum betweenness were occupied by protists belonging to uncharacterized Limnofilidae  
297 in lettuce and Allapsidae in potato (Table S4).

298 The module hubs for potato were mainly Cercozoa (an unclassified Allapsidae belonging to  
299 the as yet undescribed Group Te, and undescribed members of Imbricatea and Clade Y in  
300 Glissomonadida) and the connectors were bacteria (Rhizobiales) (Fig. S3). For lettuce, the  
301 module hubs mainly belonged to bacteria and the connectors included both bacteria  
302 belonging to Burkholderiales and Cercozoa (*Paracercomonas compacta*, and an unclassified  
303 Limnofilidae, Fig. S3).

## 304 Discussion

305 Bacterivorous flagellates, amoebiflagellates and testate amoebae dominated the cercozoan  
306 community (Fig. 1). Exemplified by Cercozoa, our results clearly confirm the existence of  
307 plant species-specific 'protist microbiomes' of bacterivores in the rhizosphere of field grown  
308 plants as postulated by Sapp *et al.* (2017). Bulk soil contained a higher diversity and  
309 evenness of cercozoan OTUs compared to the rhizospheres of lettuce and potato, which  
310 corresponds to findings on bacterial microbiota (Shi *et al.*, 2015). The reduced protist

311 diversity and the four-fold stronger combined effect on cercozoan community composition by  
312 the rhizosphere (i.e. its specific modification relative to bulk soil) and plant species identity  
313 compared to soil type (Fig. 3) reveal that the plant rhizosphere is a strong habitat filter for  
314 protist community assembly.

315 The bacterial taxa in our networks have been identified as typical members of lettuce and  
316 potato 'core microbiomes' (Cardinale *et al.*, 2015; Mitter *et al.*, 2016; Schreiter *et al.*, 2014a;  
317 Schreiter *et al.*, 2018). The term 'microbiome' *sensu stricto* denotes the microbial genes  
318 encoding specific traits supplementing the plant genome by microbial functions such as  
319 nutrient provision or pathogen defense (Berg *et al.*, 2014a; Sánchez-Cañizares *et al.*, 2017;  
320 Vandenkoornhuysen *et al.*, 2015). Correspondingly, the 'protist microbiome' supplements the  
321 plant genome by beneficial protist functions. These may include the provision of growth-  
322 limiting nutrients to plants (Bonkowski and Clarholm, 2012; Bonkowski *et al.*, 2000; Ekelund  
323 *et al.*, 2009) and associated mycorrhiza (Bonkowski *et al.*, 2001; Bukovská *et al.*, 2018;  
324 Jentschke *et al.*, 1995; Koller *et al.*, 2013a; Koller *et al.*, 2013b), the direct control of plant  
325 pathogenic fungi (Chakraborty *et al.*, 1983), or enhancing the expression of bacterial  
326 biocontrol genes and metabolites against plant pathogens (Jousset and Bonkowski, 2010;  
327 Jousset *et al.*, 2009; Jousset *et al.*, 2010).

328 Lettuce and potato specific cercozoan 'microbiomes' of bacterivorous protists however  
329 appear to contradict these earlier studies showing that protist communities were shaped by  
330 plants or their associated communities of rhizobacteria, instead of rhizosphere bacterial  
331 communities being shaped by the grazing pressure of protists (Jousset *et al.*, 2010; Jousset  
332 *et al.*, 2008; Rosenberg *et al.*, 2009; Saleem *et al.*, 2012).

333 This raises the question on the mechanisms underlying the plant species-specific assembly  
334 of protists. For rhizosphere bacteria a bottom-up regulation through resource supply from  
335 roots is seen as the major driver of community selection (Bakker *et al.*, 2015; Sasse *et al.*,  
336 2018). The composition of root exudates, by providing a crucial energy source for soil  
337 microorganisms (Kuzyakov and Blagodatskaya, 2015) and containing secondary metabolites  
338 as microbial attractants or chemical deterrents have been suggested to select for the plant  
339 species specific microbiomes (Guyonnet *et al.*, 2018; Sasse *et al.*, 2018).

340 Analogously, secondary metabolites of bacteria may shape the assembly of protist predators  
341 in the rhizosphere of plants. Bacterivorous protists trigger immediate changes in bacterial  
342 chemical defense (Flues *et al.*, 2017; Jousset and Bonkowski, 2010; Jousset *et al.*, 2006;  
343 Jousset *et al.*, 2010). Defense is energetically costly, causing inequalities due to competitive  
344 trade-offs in the growth-defense balance of bacterial communities (Jousset *et al.*, 2009).  
345 Accordingly, shifts in predation pressure sorts out winners and losers among bacteria,  
346 resulting in a functional and taxonomic remodeling of bacterial communities (Flues *et al.*,

347 2017; Glücksman *et al.*, 2010; Rosenberg *et al.*, 2009; Xiong *et al.*, 2018). Overall, grazing-  
348 resistant bacterial taxa which exhibit targeted allelopathy against eukaryotes are favored in  
349 soil systems (Arp *et al.*, 2018; Jousset, 2012; Jousset *et al.*, 2008; Matz and Kjelleberg,  
350 2005; Mazzola *et al.*, 2009). This again may have important consequences for plant  
351 performance, not only because some of these metabolites directly or indirectly influence root  
352 growth (Brazelton *et al.*, 2008; Combes-Meynet *et al.*, 2011), but because the same defense  
353 compounds ward off microbial competitors, including fungal and bacterial plant pathogens  
354 (Arp *et al.*, 2018; Meyer *et al.*, 2009; Ramette *et al.*, 2011; Russell *et al.*, 2014). Accordingly,  
355 the resulting communities of rhizosphere bacteria have been shown to express enhanced  
356 biocontrol activity, indicating increased reliability of microbiome function (Jousset *et al.*, 2011;  
357 Rosenberg *et al.*, 2009; Weidner *et al.*, 2016).

358 In correspondence with this hypothesis, our network analyses indicate non-random co-  
359 occurrences of Cercozoa and bacteria at the family level (see superscript<sup>c</sup>, Table 1). Scale-  
360 free networks exhibit specific mechanisms of self-organization, where highly connected  
361 nodes acquire links at a higher rate than those that are less connected. This leads to the  
362 emergence of a few highly connected hubs (Barabási, 2009; Montoya *et al.*, 2006; Watts and  
363 Strogatz, 1998).

364 In a food web context, the constant release of root exudates favoring specific rhizosphere  
365 bacteria and reciprocal specialized predators could result in the accumulation of co-evolved  
366 subsets of rhizosphere microbiota, leading to positive co-occurrences as seen for lettuce.  
367 Over the longer term, the accumulation of allelopathic metabolites may restrict the activity of  
368 protists (Foissner, 1987; Jousset, 2012; Jousset *et al.*, 2006), and could lead to negative co-  
369 occurrences similar to those seen for potato (Fig. 4).

370 ‘Small world’ topologies characterize highly interconnected sub-networks which are resilient  
371 to perturbations, because random losses of node species may be easily compensated by  
372 links to other nodes, except if a key node is affected (Albert *et al.*, 2000; Montoya *et al.*,  
373 2006). In this study, such ‘keystone taxa’ were identified as the cercozoan amoeboflagellate  
374 *Neoheteromita globosa* in lettuce and a *Sphingomonas* bacterium in potato. A pronounced  
375 edge width between bacteria and *Paracercomonas* and Sandonidae in both networks  
376 suggests a strong impact of these protist taxa on microbiome structure. The pronounced  
377 edge width may further indicate a certain degree of functional redundancy among  
378 *Paracercomonas* and Sandonidae, which could act as ‘trophic species’ where  
379 phylogenetically related predators may exhibit similar prey preferences. If true, such  
380 functional redundancy may contribute to the stability and self-organization of food-web  
381 relationships in the rhizosphere.

382 However, trade-offs may arise because the performance of cercozoan species differs in  
383 response to the composition of bacterial assemblages (Flues *et al.*, 2017; Glücksman *et al.*,  
384 2010; Xiong *et al.*, 2018). In a key experiment, manipulating the diversity of protist predators  
385 and their bacterial prey, Saleem *et al.* (2013) identified the synergistic exploitation of bacterial  
386 prey by predator complementarity as main driver of protist community performance. Thus  
387 prey-predator matching may lead to an optimization and functional stabilization of these  
388 interactions.

389 Overall, this study laid the foundation of a number of testable new hypotheses on  
390 microbiome assembly and functioning. Most importantly, our results suggest ripple effects of  
391 root metabolites via bacteria to the next trophic level. A dynamic feedback of rhizosphere  
392 bacteria communities on protist community assembly and vice versa has far reaching  
393 consequences for our understanding of the regulation of rhizosphere processes. While the  
394 assembly of rhizosphere bacterial communities is bottom-up controlled through the resource  
395 supply from root metabolites, our results support the hypothesis that the net effect may  
396 depend on the strength of top-down control by protist grazers, thereby stabilizing the  
397 functional performance of bacterial microbiomes on plant surfaces.

398

#### 399 **Acknowledgements**

400 This work was supported by the DFG projects (SM59/11-1/GR568121) and the Priority  
401 Program "Rhizosphere Spatiotemporal Organisation" (SPP 2089) of the German Science  
402 Foundation (DFG), as well as the Cluster of Excellence on Plant Sciences CEPLAS (EXC  
403 1028). The authors declare no conflict of interest.

404

## 405 References

- 406 **Albert R, Jeong H, Barabási A-L.** 2000. Error and attack tolerance of complex networks. *Nature* **406**,  
407 378.
- 408 **Anderson MJ.** 2001. A new method for non-parametric multivariate analysis of variance. *Austral*  
409 *Ecology* **26**, 32-46.
- 410 **Arp J, Götze S, Mukherji R, Mattern DJ, García-Altres M, Klapper M, Brock DA, Brakhage AA,**  
411 **Strassmann JE, Queller DC, Bardl B, Willing K, Peschel G, Stallforth P.** 2018. Synergistic activity of  
412 cosecreted natural products from amoebae-associated bacteria. *Proceedings of the National*  
413 *Academy of Sciences* **115**, 3758-3763.
- 414 **Baetz U, Martinoia E.** 2014. Root exudates: the hidden part of plant defense. *TRENDS PLANT SCI* **19**,  
415 90-98.
- 416 **Bakker MG, Chaparro JM, Manter DK, Vivanco JM.** 2015. Impacts of bulk soil microbial community  
417 structure on rhizosphere microbiomes of *Zea mays*. *Plant and Soil* **392**, 115-126.
- 418 **Barabási A-L.** 2009. Scale-Free Networks: A Decade and Beyond. *Science* **325**, 412-413.
- 419 **Berg G, Grube M, Schloter M, Smalla K.** 2014a. The plant microbiome and its importance for plant  
420 and human health. *Front Microbiol* **5**, 491.
- 421 **Berg G, Grube M, Schloter M, Smalla K.** 2014b. Unraveling the plant microbiome: looking back and  
422 future perspectives. *Front Microbiol* **5**, 148.
- 423 **Berg G, Smalla K.** 2009. Plant species and soil type cooperatively shape the structure and function of  
424 microbial communities in the rhizosphere. *FEMS Microbiology Ecology* **68**, 1-13.
- 425 **Bonkowski M.** 2004. Protozoa and plant growth: the microbial loop in soil revisited. *New Phytologist*  
426 **162**, 617-631.
- 427 **Bonkowski M, Clarholm M.** 2012. Stimulation of plant growth through interactions of bacteria and  
428 protozoa: testing the auxillary microbial loop hypothesis. *Acta Protozoologica* **51**, 237-247.
- 429 **Bonkowski M, Griffiths B, Scrimgeour C.** 2000. Substrate heterogeneity and microfauna in soil  
430 organic 'hotspots' as determinants of nitrogen capture and growth of ryegrass. *Applied Soil Ecology*  
431 **14**, 37-53.
- 432 **Bonkowski M, Jentschke G, Scheu S.** 2001. Contrasting effects of microbes in the rhizosphere:  
433 interactions of mycorrhiza (*Paxillus involutus* (Batsch) Fr.), naked amoebae (Protozoa) and Norway  
434 Spruce seedlings (*Picea abies* Karst.). *Applied Soil Ecology* **18**, 193-204.
- 435 **Brazelton JN, Pfeufer EE, Sweat TA, Gardener BBM, Coenen C.** 2008. 2, 4-Diacetylphloroglucinol  
436 alters plant root development. *Molecular Plant-Microbe Interactions* **21**, 1349-1358.
- 437 **Bukovská P, Bonkowski M, Konvalinková T, Beskid O, Hujšlová M, Püschel D, Řezáčová V,**  
438 **Gutiérrez-Núñez MS, Gryndler M, Jansa J.** 2018. Utilization of organic nitrogen by arbuscular  
439 mycorrhizal fungi—is there a specific role for protists and ammonia oxidizers? *Mycorrhiza* **28**, 269–  
440 283.
- 441 **Camacho C, Coulouris G, Avagyan V, Ma N, Papadopoulos J, Bealer K, Madden TL.** 2009. BLAST+:  
442 architecture and applications. *BMC Bioinformatics* **10**, 421.
- 443 **Cardinale M, Grube M, Erlacher A, Quehenberger J, Berg G.** 2015. Bacterial networks and co-  
444 occurrence relationships in the lettuce root microbiota. *Environ Microbiol* **17**, 239-252.
- 445 **Chakraborty S, Old KM, Warcup JH.** 1983. Amoebae from a take-all suppressive soil which feed on  
446 *Gaeumannomyces graminis tritici* and other soil fungi. *Soil Biology and Biochemistry* **15**, 17-24.
- 447 **Combes-Meynet E, Pothier JF, Moenne-Loccoz Y, Prigent-Combaret C.** 2011. The *Pseudomonas*  
448 secondary metabolite 2,4-Diacetylphloroglucinol is a signal inducing rhizoplane expression of

- 449 *Azospirillum* genes involved in plant-growth promotion. *Molecular Plant-Microbe Interactions* **24**,  
450 271-284.
- 451 **Delmas E, Besson M, Brice M-H, Burkle LA, Dalla Riva GV, Fortin M-J, Gravel D, Guimarães Jr. PR,**  
452 **Hembry DH, Newman EA, Olesen JM, Pires MM, Yeakel JD, Poisot T.** 2019. Analysing ecological  
453 networks of species interactions. *Biological Reviews* **94**, 16-36.
- 454 **Deng Y, Jiang YH, Yang Y, He Z, Luo F, Zhou J.** 2012. Molecular ecological network analyses. *BMC*  
455 *Bioinformatics* **13**, 113.
- 456 **Edgar RC, Haas BJ, Clemente JC, Quince C, Knight R.** 2011. UCHIME improves sensitivity and speed of  
457 chimera detection. *Bioinformatics* **27**, 2194-2200.
- 458 **Ekelund F, Saj S, Vestergard M, Bertaux J, Mikola J.** 2009. The "soil microbial loop" is not always  
459 needed to explain protozoan stimulation of plants. *Soil Biology & Biochemistry* **41**, 2336-2342.
- 460 **Fiore-Donno AM, Rixen C, Rippin M, Glaser K, Samolov E, Karsten U, Becker B, Bonkowski M.** 2018.  
461 New barcoded primers for efficient retrieval of cercozoan sequences in high-throughput  
462 environmental diversity surveys, with emphasis on worldwide biological soil crusts. *Molecular*  
463 *Ecology Resources* **18**, 229-239.
- 464 **Flues S, Bass D, Bonkowski M.** 2017. Grazing of leaf-associated Cercomonads (Protists: Rhizaria:  
465 Cercozoa) structures bacterial community composition and function. *Environmental Microbiology* **19**,  
466 3297-3309.
- 467 **Foissner W.** 1987. Ciliatostasis: a new basis to the understanding of terricolous Protozoa zoonoses.  
468 Ciliatostasis: ein neuer Ansatz zum Verstandnis terricoler Protozoen- Zoonosen **17**, 371-377.
- 469 **Girvan MS, Bullimore J, Pretty JN, Osborn AM, Ball AS.** 2003. Soil type is the primary determinant of  
470 the composition of the total and active bacterial communities in arable soils. *Applied and*  
471 *Environmental Microbiology* **69**, 1800-1809.
- 472 **Glücksman E, Bell T, Griffiths RI, Bass D.** 2010. Closely related protist strains have different grazing  
473 impacts on natural bacterial communities. *Environmental Microbiology* **12**, 3105-3113.
- 474 **Guillou L, Bachar D, Audic S, Bass D, Berney C, Bittner L, Boutte C, Burgaud G, de Vargas C, Decelle**  
475 **J, del Campo J, Dolan JR, Dunthorn M, Edvardsen B, Holzmann M, Kooistra WHCF, Lara E, Bescot**  
476 **NL, Logares R, Mahé F, Massana R, Montresor M, Morard R, Not F, Pawlowski J, Probert I, Sauvadet**  
477 **A-L, Siano R, Stoeck T, Vaulot D, Zimmermann P, Christen R.** 2013. The Protist Ribosomal Reference  
478 database (PR2): a catalog of unicellular eukaryote Small Sub-Unit rRNA sequences with curated  
479 taxonomy. *NUCLEIC ACIDS RESEARCH* **41**, D597-D604.
- 480 **Guimera R, Amaral LAN.** 2005. Cartography of complex networks: modules and universal roles.  
481 *Journal of Statistical Mechanics-Theory and Experiment* **2005**, nihpa35573.
- 482 **Guyonnet JP, Guillemet M, Dubost A, Simon L, Ortet P, Barakat M, Heulin T, Achouak W, Haichar**  
483 **FEZ.** 2018. Plant nutrient resource use strategies shape active rhizosphere microbiota through root  
484 exudation. *Frontiers in Plant Science* **9**, 1662-1662.
- 485 **Hacquard S, Garrido-Oter R, Gonzalez A, Spaepen S, Ackermann G, Lebeis S, McHardy AC, Dangl JL,**  
486 **Knight R, Ley R, Schulze-Lefert P.** 2015. Microbiota and Host Nutrition across Plant and Animal  
487 Kingdoms. *Cell Host Microbe* **17**, 603-616.
- 488 **Haichar FeZ, Marol C, Berge O, Rangel-Castro JI, Prosser JI, Balesdent J, Heulin T, Achouak W.** 2008.  
489 Plant host habitat and root exudates shape soil bacterial community structure. *ISME J* **2**, 1221-1230.
- 490 **Hirsch PR, Mauchline TH.** 2012. Who's who in the plant root microbiome? *Nat Biotech* **30**, 961-962.
- 491 **Jentschke G, Bonkowski M, Godbold DL, Scheu S.** 1995. Soil protozoa and forest tree growth: non-  
492 nutritional effects and interaction with mycorrhizae. *Biology and Fertility of Soils* **20**, 263-269.

- 493 **Jones DL, Nguyen C, Finlay RD.** 2009. Carbon flow in the rhizosphere: carbon trading at the soil-root  
494 interface. *Plant and Soil* **321**, 5-33.
- 495 **Jousset A.** 2012. Ecological and evolutive implications of bacterial defences against predators.  
496 *Environmental Microbiology* **14**, 1830-1843.
- 497 **Jousset A, Bonkowski M.** 2010. The model predator *Acanthamoeba castellanii* induces the  
498 production of 2,4, DAPG by the biocontrol strain *Pseudomonas fluorescens* Q2-87. *Soil Biology and*  
499 *Biochemistry* **42**, 1647-1649.
- 500 **Jousset A, Lara E, Wall LG, Valverde C.** 2006. Secondary metabolites help biocontrol strain  
501 *Pseudomonas fluorescens* CHA0 to escape protozoan grazing. *Applied and Environmental*  
502 *Microbiology* **72** 7083-7090.
- 503 **Jousset A, Rochat L, Lanoue A, Bonkowski M, Keel C, Scheu S.** 2011. Plants respond to pathogen  
504 infection by enhancing the antifungal gene expression of root-associated bacteria. *Molecular Plant-*  
505 *Microbe Interactions* **24**, 352-358.
- 506 **Jousset A, Rochat L, Pechy-Tarr M, Keel C, Scheu S, Bonkowski M.** 2009. Predators promote defence  
507 of rhizosphere bacterial populations by selective feeding on non-toxic cheaters. *ISME Journal* **3**, 666-  
508 674.
- 509 **Jousset A, Rochat L, Scheu S, Bonkowski M, Keel C.** 2010. Predator-prey chemical warfare  
510 determines the expression of biocontrol genes by rhizosphere-associated *Pseudomonas fluorescens*.  
511 *Applied and Environmental Microbiology* **76**, 5263-5268.
- 512 **Jousset A, Scheu S, Bonkowski M.** 2008. Secondary metabolite production facilitates establishment  
513 of rhizobacteria by reducing both protozoan predation and the competitive effects of indigenous  
514 bacteria. *Functional Ecology* **22**, 714-719.
- 515 **Koller R, Rodriguez A, Robin C, Scheu S, Bonkowski M.** 2013a. Protozoa enhance foraging efficiency  
516 of arbuscular mycorrhizal fungi for mineral nitrogen from organic matter in soil to the benefit of host  
517 plants. *New Phytologist* **199**, 203-211.
- 518 **Koller R, Scheu S, Bonkowski M, Robin C.** 2013b. Protozoa stimulate N uptake and growth of  
519 arbuscular mycorrhizal plants. *Soil Biology & Biochemistry* **65**, 204-210.
- 520 **Kuzyakov Y, Blagodatskaya E.** 2015. Microbial hotspots and hot moments in soil: Concept & review.  
521 *Soil Biology and Biochemistry* **83**, 184-199.
- 522 **Lundberg DS, Lebeis SL, Paredes SH, Yourstone S, Gehring J, Malfatti S, Tremblay J, Engelbrektson**  
523 **A, Kunin V, Rio TGd, Edgar RC, Eickhorst T, Ley RE, Hugenholtz P, Tringe SG, Dangl JL.** 2012. Defining  
524 the core *Arabidopsis thaliana* root microbiome. *Nature* **488**, 86-90.
- 525 **Martiny JB, Jones SE, Lennon JT, Martiny AC.** 2015. Microbiomes in light of traits: a phylogenetic  
526 perspective. *Science* **350**, aac9323.
- 527 **Matz C, Kjelleberg S.** 2005. Off the hook – how bacteria survive protozoan grazing. *Trends in*  
528 *Microbiology* **13**, 302-307.
- 529 **Mazzola M, de Bruijn I, Cohen MF, Raaijmakers JM.** 2009. Protozoan-induced regulation of cyclic  
530 lipopeptide biosynthesis is an effective predation defense mechanism for *Pseudomonas fluorescens*.  
531 *Appl. Environ. Microbiol.* **75**, 6804-6811.
- 532 **Meyer SLF, Halbrendt JM, Carta LK, Skantar AM, Liu T, Abdelnabby HME, Vinyard BT.** 2009. Toxicity  
533 of 2,4-diacetylphloroglucinol (DAPG) to plant-parasitic and bacterial-feeding nematodes. *J Nematol*  
534 **41**.
- 535 **Mitter B, Pfeiffer S, Sessitsch A, Oswald A, Schloter-Hai B, Schloter M, Declerck S.** 2016.  
536 Rhizosphere microbiomes of potato cultivated in the High Andes show stable and dynamic core  
537 microbiomes with different responses to plant development. *FEMS Microbiology Ecology* **93**.

- 538 **Montoya JM, Pimm SL, Solé RV.** 2006. Ecological networks and their fragility. *Nature* **442**, 259-264.
- 539 **Müller DB, Vogel C, Bai Y, Vorholt JA.** 2016. The Plant Microbiota: Systems-Level Insights and  
540 Perspectives. *Annu Rev Genet* **50**, 211-234.
- 541 **Oksanen J, Blanchet F, Kindt R, Legendre P, Minchin P, O'Hara R, Simpson G, Solymos P, Stevens M,**  
542 **Wagner H.** 2015. Vegan: community ecology. R package version 2.2-1. R Project for Statistical  
543 Computing, Vienna, Austria.
- 544 **Olesen JM, Bascompte J, Dupont YL, Jordano P.** 2006. The smallest of all worlds: Pollination  
545 networks. *Journal of Theoretical Biology* **240**, 270-276.
- 546 **Peiffer JA, Spor A, Koren O, Jin Z, Tringe SG, Dangl JL, Buckler ES, Ley RE.** 2013. Diversity and  
547 heritability of the maize rhizosphere microbiome under field conditions. *Proceedings of the National*  
548 *Academy of Sciences* **110**, 6548-6553.
- 549 **Peres-Neto PR, Legendre P, Dray S, Borcard D.** 2006. Variation partitioning of species data matrices:  
550 Estimation and comparison of fractions. *Ecology* **87**, 2614-2625.
- 551 **Philippot L, Raaijmakers JM, Lemanceau P, van der Putten WH.** 2013. Going back to the roots: the  
552 microbial ecology of the rhizosphere. *Nat Rev Micro* **11**, 789-799.
- 553 **Porrás-Alfaro A, Bayman P.** 2011. Hidden fungi, emergent properties: endophytes and microbiomes.  
554 *Annu Rev Phytopathol* **49**, 291-315.
- 555 **Pruesse E, Quast C, Knittel K, Fuchs BM, Ludwig W, Peplies J, Glöckner FO.** 2007. SILVA: a  
556 comprehensive online resource for quality checked and aligned ribosomal RNA sequence data  
557 compatible with ARB. *NUCLEIC ACIDS RESEARCH* **35**, 7188-7196.
- 558 **Ramette A, Frapolli M, Fischer-Le Saux M, Gruffaz C, Meyer JM, Defago G, Sutra L, Moenne-Loccoz**  
559 **Y.** 2011. *Pseudomonas protegens* sp. nov., widespread plant-protecting bacteria producing the  
560 biocontrol compounds 2,4-diacetylphloroglucinol and pyoluteorin. *Systematic and Applied*  
561 *Microbiology* **34**, 180-188.
- 562 **Rodríguez R, White Jr J, Arnold A, Redman R.** 2009. Fungal endophytes: diversity and functional  
563 roles. *New Phytologist* **182**, 314-330.
- 564 **Rognes T, Flouri T, Nichols B, Quince C, Mahé F.** 2016. VSEARCH: a versatile open source tool for  
565 metagenomics. *PeerJ* **4**, e2584.
- 566 **Rosenberg K, Bertaux J, Krome K, Hartmann A, Scheu S, Bonkowski M.** 2009. Soil amoebae rapidly  
567 change bacterial community composition in the rhizosphere of *Arabidopsis thaliana*. *ISME Journal* **3**,  
568 675-684.
- 569 **Russell AB, Peterson SB, Mougous JD.** 2014. Type VI secretion system effectors: poisons with a  
570 purpose. *Nat Rev Microbiol* **12**, 137-148.
- 571 **Saleem M, Fetzer I, Dormann CF, Harms H, Chatzinotas A.** 2012. Predator richness increases the  
572 effect of prey diversity on prey yield. *Nat Commun* **3**, 1305.
- 573 **Saleem M, Fetzer I, Harms H, Chatzinotas A.** 2013. Diversity of protists and bacteria determines  
574 predation performance and stability. *ISME J* **7**, 1912-1921.
- 575 **Sánchez-Cañizares C, Jorrín B, Poole PS, Tkacz A.** 2017. Understanding the holobiont: the  
576 interdependence of plants and their microbiome. *Current Opinion in Microbiology* **38**, 188-196.
- 577 **Sapp M, Ploch S, Fiore-Donno AM, Bonkowski M, Rose L.** 2017. Protists are an integral part of the  
578 *Arabidopsis thaliana* microbiome. *Environmental Microbiology* **20**, 30-43.
- 579 **Sasse J, Martinoia E, Northen T.** 2018. Feed your friends: Do plant exudates shape the root  
580 microbiome? *Trends in Plant Science* **23**, 25-41.



- 581 **Schloss PD, Westcott SL, Ryabin T, Hall JR, Hartmann M, Hollister EB, Lesniewski RA, Oakley BB,**  
582 **Parks DH, Robinson CJ, Sahl JW, Stres B, Thallinger GG, Van Horn DJ, Weber CF.** 2009. Introducing  
583 *mothur*: open-source, platform-independent, community-supported software for describing and  
584 comparing microbial communities. *Applied and Environmental Microbiology* **75**, 7537-7541.
- 585 **Schreiter S, Ding G-C, Heuer H, Neumann G, Sandmann M, Grosch R, Kropf S, Smalla K.** 2014a.  
586 Effect of the soil type on the microbiome in the rhizosphere of field-grown lettuce. *Frontiers in*  
587 *Microbiology* **5**.
- 588 **Schreiter S, Sandmann M, Smalla K, Grosch R.** 2014b. Soil type dependent rhizosphere competence  
589 and biocontrol of two bacterial inoculant strains and their effects on the rhizosphere microbial  
590 community of field-grown lettuce. *PLoS ONE* **9**, e103726.
- 591 **Schreiter SS, Babin DD, Smalla KK, Grosch RR.** 2018. Rhizosphere competence and biocontrol effect  
592 of *Pseudomonas* sp. RU47 independent from plant species and soil type at the field scale. *Frontiers in*  
593 *Microbiology* **9**, 97.
- 594 **Sessitsch A, Weilharter A, Gerzabek MH, Kirchmann H, Kandeler E.** 2001. Microbial Population  
595 Structures in Soil Particle Size Fractions of a Long-Term Fertilizer Field Experiment. *Applied and*  
596 *Environmental Microbiology* **67**, 4215-4224.
- 597 **Shannon P, Markiel A, Ozier O, Baliga NS, Wang JT, Ramage D, Amin N, Schwikowski B, Ideker T.**  
598 2003. Cytoscape: A software environment for integrated models of biomolecular interaction  
599 networks. *Genome Research* **13**, 2498-2504.
- 600 **Shi S, Nuccio E, Herman DJ, Rijkers R, Estera K, Li J, da Rocha UN, He Z, Pett-Ridge J, Brodie EL, Zhou**  
601 **J, Firestone M.** 2015. Successional Trajectories of Rhizosphere Bacterial Communities over  
602 Consecutive Seasons. *MBio* **6**.
- 603 **Team RC.** 2014. R: A language and environment for statistical computing. *R Foundation for Statistical*  
604 *Computing*. Vienna, Austria.
- 605 **Trap J, Bonkowski M, Plassard C, Villenave C, Blanchart E.** 2016. Ecological importance of soil  
606 bacterivores for ecosystem functions. *Plant and Soil* **398**, 1-24.
- 607 **Turner TR, Ramakrishnan K, Walshaw J, Heavens D, Alston M, Swarbreck D, Osbourn A, Grant A,**  
608 **Poole PS.** 2013. Comparative metatranscriptomics reveals kingdom level changes in the rhizosphere  
609 microbiome of plants. *ISME J* **7**, 2248-2258.
- 610 **Ulrich A, Becker R.** 2006. Soil parent material is a key determinant of the bacterial community  
611 structure in arable soils. *FEMS Microbiology Ecology* **56**, 430-443.
- 612 **van Dam NM, Bouwmeester HJ.** 2016. Metabolomics in the rhizosphere: tapping into belowground  
613 chemical communication. *Trends in Plant Science* **21**, 256-265.
- 614 **Vandenkoornhuyse P, Quaiser A, Duhamel M, Le Van A, Dufresne A.** 2015. The importance of the  
615 microbiome of the plant holobiont. *NEW PHYTOL* **206**.
- 616 **Watts DJ, Strogatz SH.** 1998. Collective dynamics of 'small-world' networks. *Nature* **393**, 440.
- 617 **Weidner S, Latz E, Agaras B, Valverde C, Jousset A.** 2016. Protozoa stimulate the plant beneficial  
618 activity of rhizospheric pseudomonads. *Plant and Soil* **410**, 509-515.
- 619 **Xiong W, Jousset A, Guo S, Karlsson I, Zhao Q, Wu H, Kowalchuk GA, Shen Q, Li R, Geisen S.** 2018.  
620 Soil protist communities form a dynamic hub in the soil microbiome. *ISME J* **12**, 634-638.
- 621 **Zhou J, Deng Y, Luo F, He Z, Yang Y.** 2011. Phylogenetic molecular ecological network of soil  
622 microbial communities in response to elevated CO<sub>2</sub>. *mBio* **2**, e00122-00111.
- 623

624 **Tables**

625

626 **Table 1:** Topological features of empirical lettuce and potato bacteria-Cercozoa rhizosphere networks  
627 and of associated random networks generated by randomly rewiring all nodes and links 100 times.

628 The following features are reported: similarity threshold; total number of nodes (total nodes); number  
629 of nodes consisting of protists (Protists); number of nodes consisting of bacteria (Bacteria); number of  
630 total links (total links); number of links only between bacterial taxa or cercozoan taxa (Intra-domain  
631 links); number of links between bacterial taxa and cercozoan taxa (Inter-domain links); connectance;  
632 and betweenness centrality; the proportion of variance explained under the assumption that the  
633 number of connections per node followed a power law function ( $R^2$  of power law); average number of  
634 connections (average degree, avgK); average clustering coefficient (avgCC); average distance  
635 between nodes (average path distance, APD); and number of network modules (Modularity, MOD).

|                              | <b>Features</b>                                     | <b>Lettuce</b>          | <b>Potato</b>           |
|------------------------------|-----------------------------------------------------|-------------------------|-------------------------|
| Empirical networks           | Similarity threshold                                | 0.85                    | 0.85                    |
|                              | Total nodes                                         | 276                     | 345                     |
|                              | Protists                                            | 130                     | 164                     |
|                              | Bacteria                                            | 146                     | 181                     |
|                              | Total links                                         | 441                     | 556                     |
|                              | Intra-domain links                                  | 111                     | 338                     |
|                              | Inter-domain links                                  | 310                     | 218                     |
|                              | Connectance (Con)                                   | 0.536                   | 0.539                   |
|                              | Betweenness Centrality (BC)                         | 0.136                   | 0.133                   |
|                              | $R^2$ of power law <sup>b</sup>                     | 0.989                   | 0.975                   |
|                              | Average degree (avgK)                               | 3.196                   | 3.223                   |
|                              | Average clustering coefficient (avgCC) <sup>c</sup> | 0.181 <sup>d</sup>      | 0.210 <sup>d</sup>      |
|                              | Average path distance (APD) <sup>c</sup>            | 6.117 <sup>d</sup>      | 7.152 <sup>d</sup>      |
|                              | Modularity (MOD) <sup>c</sup>                       | 0.732 (44) <sup>d</sup> | 0.779 (45) <sup>d</sup> |
| Random networks <sup>a</sup> | Average clustering coefficient (avgCC)              | 0.018 ± 0.006           | 0.014 ± 0.005           |
|                              | Average path distance (APD)                         | 4.284 ± 0.071           | 4.462 ± 0.065           |
|                              | Modularity (MOD)                                    | 0.573 ± 0.008           | 0.580 ± 0.007           |

- a. Random networks were generated by randomly rewiring all nodes and links 100 times  
b. Test if the number of connections (k) per node (N) followed a power law ( $N(k) \sim k^{-1}$ ).  
c. Significant difference ( $P < 0.001$ ) in avgCC, APD and MOD of empirical networks compared to random networks for both lettuce and potato, based on one sample student's *t* test.  
d. Significant difference ( $P < 0.001$ ) in avgCC, APD and MOD between lettuce and potato using Student's *t* test.

636

637 **Figure legends**

638

639 **Fig 1.** Sankey diagram showing the relative contribution of OTUs to the taxonomic diversity.  
640 Taxonomical assignment was based on the best hit by BLAST. From left to right, names refer  
641 to phyla (Cercozoa, Endomyxa), class (ending -ea), and orders (ending -ida). “Others” refer  
642 to sequences that could either not be assigned to the next lower-ranking taxon or made up  
643 less than 1% of cercozoan diversity. Numbers are percentages of sequence abundance.

644

645 **Fig. 2.** Non-metric multidimensional scaling (NMDS) of Bray-Curtis dissimilarities among  
646 cercozoan communities for lettuce (green colors) and potato (brown colors) separated by soil  
647 type with diluvial sand (DS, triangle), alluvial loam (AL, square), and loess loam (LL, circle)  
648 (PERMANOVA  $R^2 = 0.62$ ,  $F_{8,110} = 22.14$ ,  $P = 0.001$ ). NMDS stress value was 0.089.

649

650 **Fig. 3.** Partitioning of variance explained in beta diversity of cercozoan communities by three  
651 different soil types (Soil Type), plant species identity (Plant) and rhizosphere versus bulk soil  
652 (Rh vs. Bs). Residuals of unexplained variance were 0.665, \*\*\* indicates  $P < 0.001$ .

653

654 **Fig. 4.** Microbial co-occurrence networks based on correlation analysis of bacteria (circles)  
655 and cercozoan protists (orange triangles) for lettuce (left) and potato (right). The relative  
656 abundance of bacteria and Cercozoa is represented on family level by the size of nodes.  
657 Node colors were mapped to the phylum level. A connection shows the union of negative or  
658 positive co-occurrence between bacterial communities and cercozoan communities on OTU  
659 level. Positive and negative co-occurrences are indicated by blue and red edges,  
660 respectively, whereas the edge widths indicate the proportion of correlations among OTUs  
661 between two families of bacteria and protists. Nodes were clustered on family level based on  
662 their current taxonomy and loops that indicate co-occurrence relationships of microbial  
663 species of the same trophic level or family were removed.

664

665

666 **Figures**

667

668 Figure 1

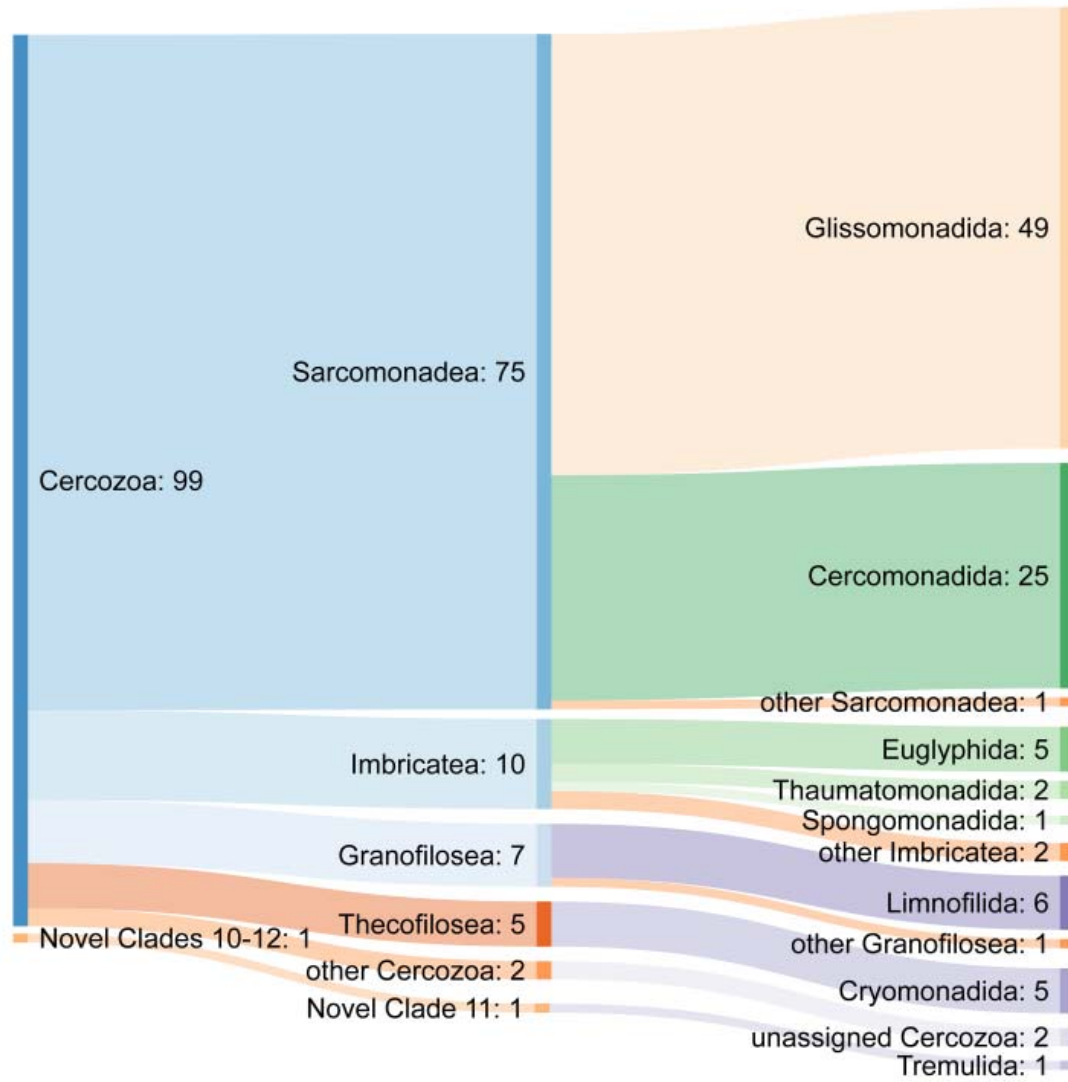

669

670

671 Figure 2

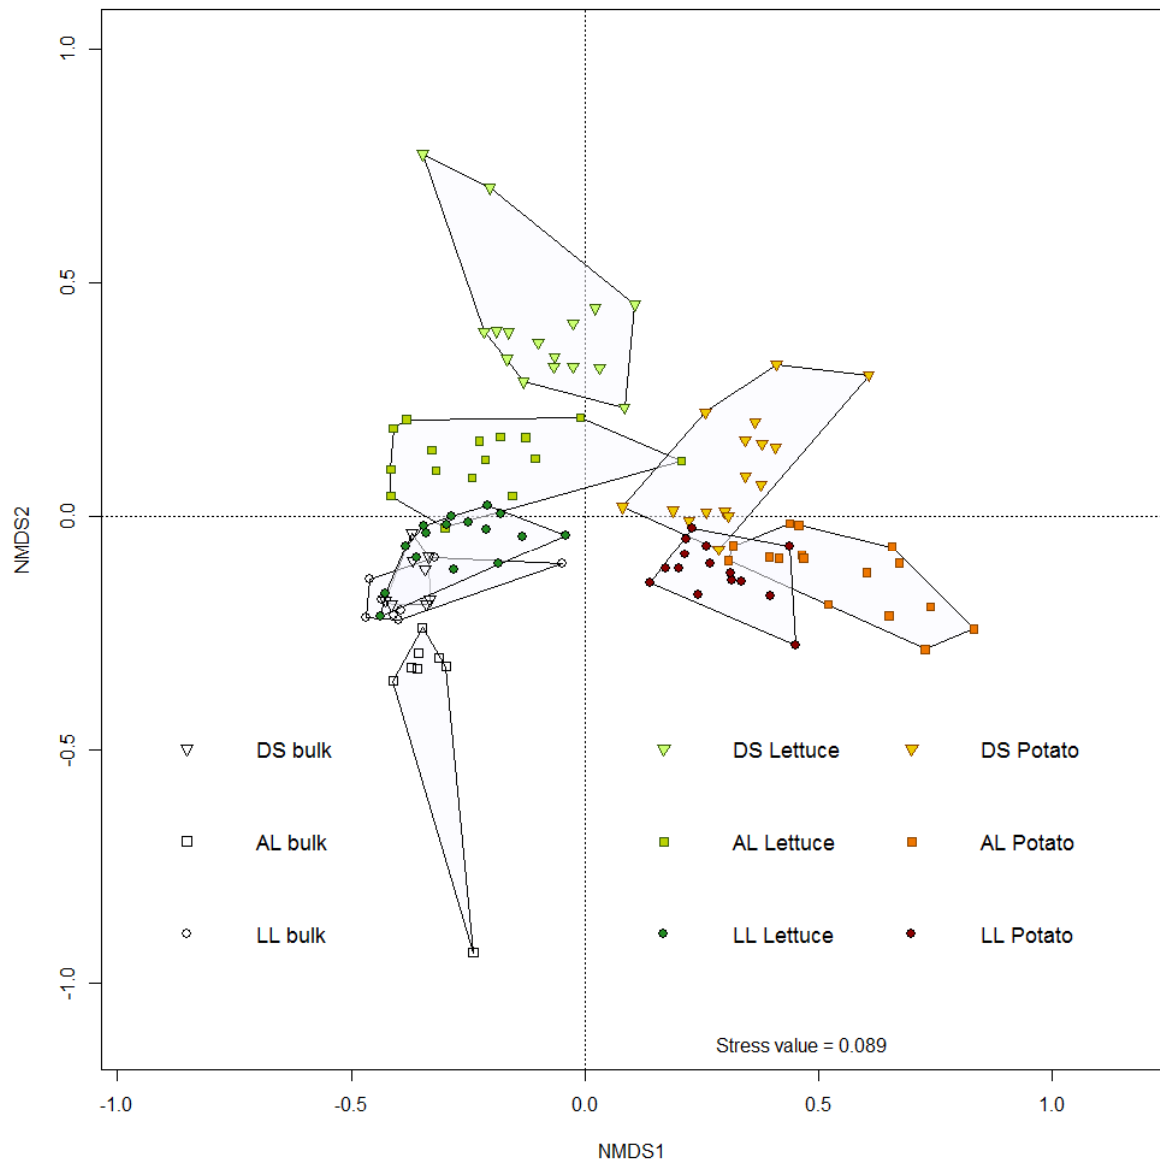

672

673

674 Figure 3

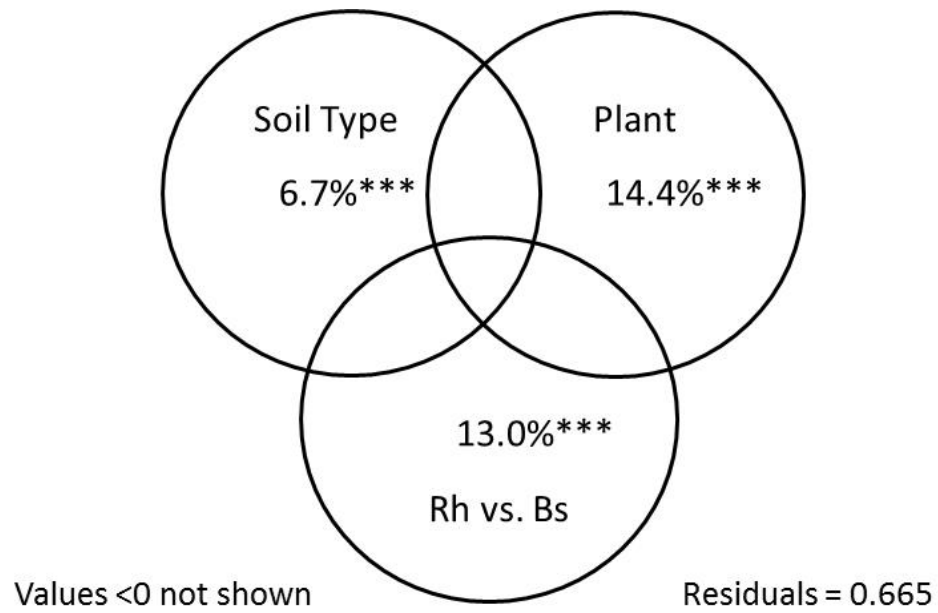

675

676

677 Figure 4

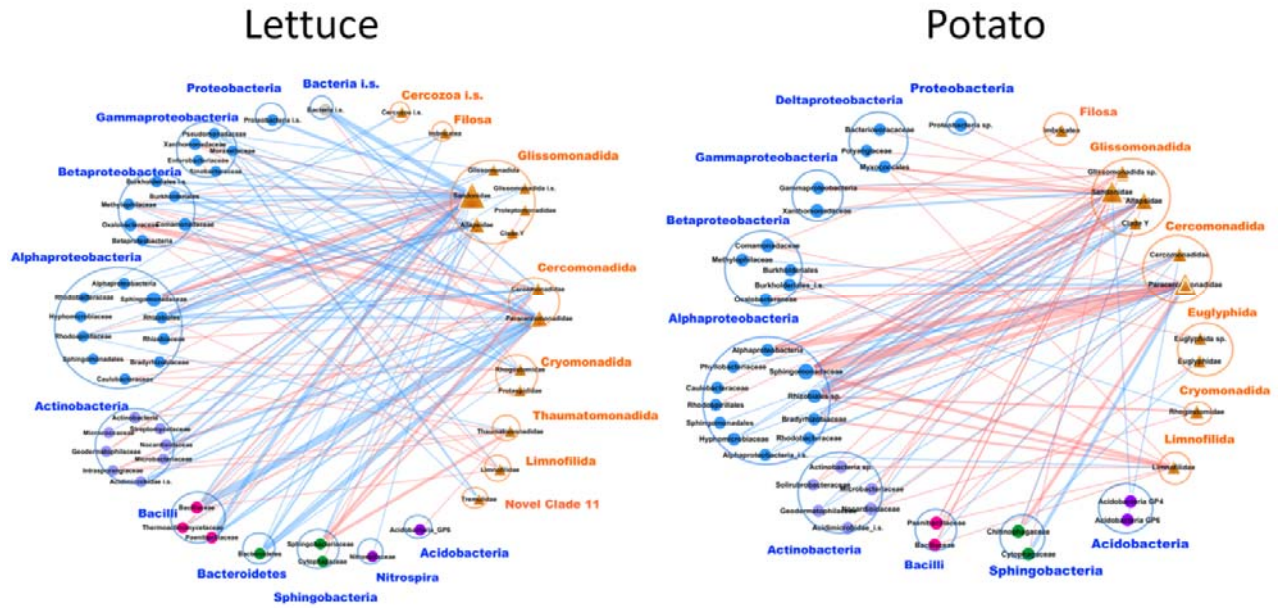

678

679
